# Supplementary material for: Quantum dot probes for observation of single molecule DNA and a synthetic polyelectrolyte higher-order structure
Source: Royal Society of Chemistry journal article supplement (doi:10.1039/c001686a), 2010-01-01
Supplement: c001686a.pdf [file c001686a.pdf]

## Supporting Information for:

# Quantum Dot Probes for Observation of Single Molecule DNA and a Synthetic Polyelectrolyte Higher-Order Structure

*Ning Chen,<sup>1,2</sup> Anatoly A. Zinchenko,<sup>\*1,2</sup> Yuka Yamazaki,<sup>1</sup> Yuko Yoshikawa,<sup>3</sup> Shizuaki*

*Murata,<sup>1</sup> Kenichi Yoshikawa<sup>2,4</sup>*

<sup>1</sup>Graduate School of Environmental Studies, Nagoya University, Furou-cho, Nagoya 464-8601 Japan, <sup>2</sup> Spatio-Temporal Order Project, ICORP, JST, Tokyo, Japan, <sup>3</sup>Faculty of Education for Future Generations, International Pacific University, Okayama 709-0863 Japan, <sup>4</sup>Department of Physics, Graduate School of Science, Kyoto University, Kyoto 606-8502 Japans

**Supplementary data for Figure 3. Fluorescence dyes and fluorescence filters.**

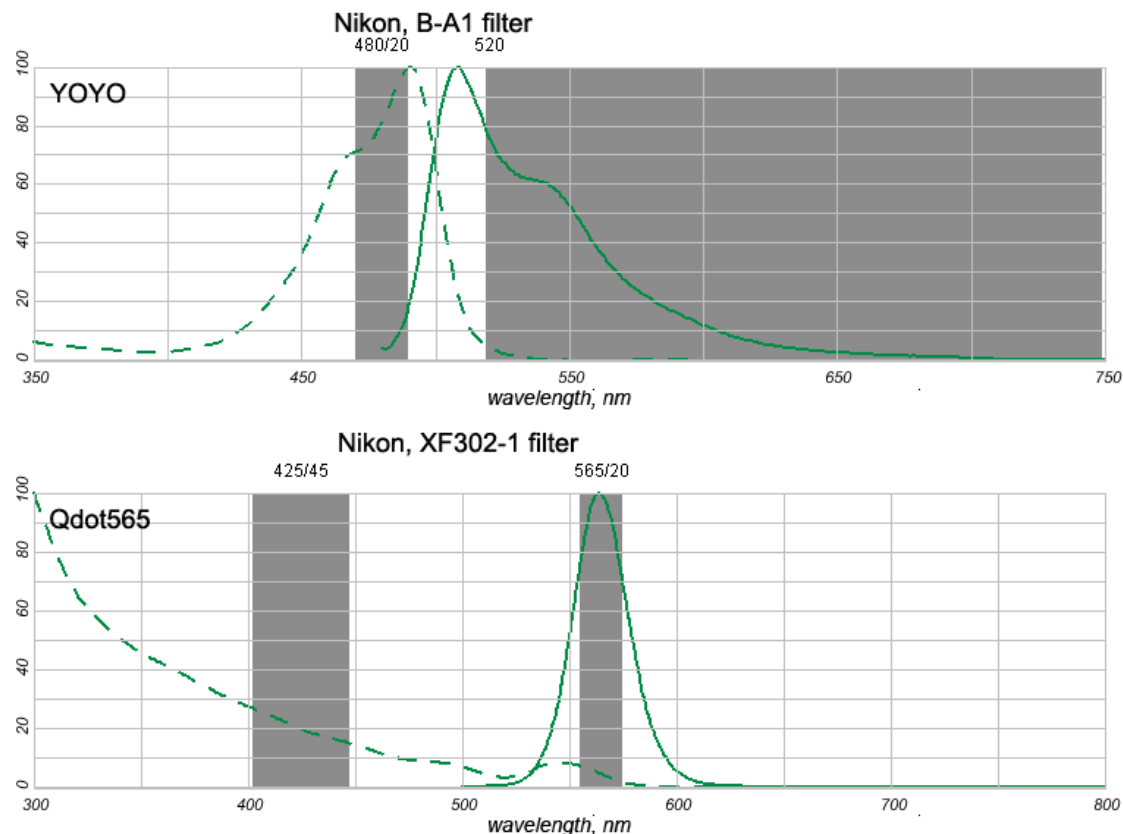

**Figure 1.** Absorbance (dashed line) and fluorescence (solid line) spectra of YOYO and Qdot 565 fluorescence dyes and excitation/emission bandpass characteristics of B-A1 and XF302-1 filters (left gray bandpass – excitation, right bandpass – emission). Using YOYO specific filter (Nikon B-1A) strong fluorescence of YOYO dye together with a low signal from Qdot is observed. When Qdot 565-specific filter (Nikon XF302-1) was used for observation, only fluorescence of Qdot is observed because YOYO has a very low absorbance below 450 nm. (spectra are prepared using open access spectra analysis application on Invitrogen Inc., USA web site, <http://www.invitrogen.com>)
